# Supplementary material for: Efficiency, mechanism and application prospect of ammonium adsorption and desorption over a sodium-acetate-modified synthetic zeolite
Source: Royal Society of Chemistry journal article supplement (doi:10.1039/d4ra01547a), 2024-01-01
Supplement: d4ra01547a1.pdf [file d4ra01547a1.pdf]

1 *Supplementary Information*

2

3 **Efficiency, mechanism and application prospect of ammonium adsorption and**  
4 **desorption over a sodium-acetate-modified synthetic zeolite**

5

6 Heng-Deng Zhou<sup>1</sup>, Chu-Ya Wang<sup>\*,1</sup>, Qi Wang, Bo-Xing Xu and Guangcan Zhu

7

8 School of Energy and Environment, Southeast University, Nanjing 210096, China.

9

10 \* Corresponding author:

11 Dr. Chu-Ya Wang, E-mail: wang-cy@seu.edu.cn.

12

13 **Text. S1**

14 Synthetic zeolite was modified with different sodium acetate concentrations to  
15 explore the effect of sodium acetate concentrations on the  $\text{NH}_4^+$  adsorption efficiency  
16 of modified synthetic zeolite. The experimental conditions were as follows: the  
17 adsorbent dosage was 10 g/L, initial  $\text{NH}_4^+$  concentration was 100 mg/L, and agitation  
18 frequency was set at 150 rpm. The results are depicted in **Fig. S1**. With the increase of  
19 sodium acetate concentration, the adsorption effect of  $\text{NH}_4^+$  was enhanced. However,  
20 when the concentration of sodium acetate surpassed 1 mol/L, the adsorption capacity  
21 for  $\text{NH}_4^+$  tended to plateau. At this point, an excessively high concentration of sodium  
22 acetate solution limited the zeolite available for  $\text{Na}^+$  exchange, leading to resource  
23 wastage. Considering the efficacy and cost-effectiveness of  $\text{NH}_4^+$  removal, subsequent  
24 experimentation established 1 mol/L as the optimal zeolite modification concentration.  
25 The adsorption capacity of the synthetic zeolite modified with the optimal concentration  
26 of sodium acetate was nearly double that of the unmodified counterpart.

27

28 **Text. S2**

29 The sodium (Na) level in MSZ before to ammonium adsorption is 8.86%, but after  
30 adsorption, it decreased to 6.81%. During the adsorption process of 1 g of MSZ, 0.0205  
31 grams of Na<sup>+</sup> (equivalent to 0.00089 mol) was ionically exchanged. Given that the pH  
32 was 7 and there were no other ions present in the simulated water that could cause  
33 interference, it could be concluded that the exchange of Na<sup>+</sup> exclusively occurred with  
34 ammonium. The amount of ammonium adsorbed by 1 g MSZ ion during exchange is  
35 0.00089 mol (16.04 mg). Based on the adsorption isotherm at a temperature of 25°C,  
36 the adsorption capacity of MSZ at an initial concentration of 200 mg/L was 20.59 mg/g.  
37 So, the ion exchange ratio was calculated as 77.90% by dividing 16.04 by 20.49.

38 Furthermore, the Na<sup>+</sup> concentration in the solution exhibited a 77.49 ppm increase  
39 both before and after the adsorption of ammonium. The data indicated that 77.49 mg/L  
40 of sodium ions (equal to 3.37 mol/L) were substituted by ammonium ions via ion  
41 exchange. The change in ammonium concentration attributed to ion exchange amounts  
42 to 60.66 mg/L, calculated as the product of 3.37 and 18 (Molar mass of NH<sub>4</sub><sup>+</sup>).  
43 Simultaneously, the ammonium concentration in the solution decreased by 82.78 mg/L.  
44 The ion exchange ratio can be calculated as  $60.66/82.78=73.28\%$ . The discrepancy was  
45 smaller than 5% between the outcomes computed based on the salt level in MSZ.

46

47 **Text. S3**

48 The breakthrough curve illustrates the impact of varying concentrations of  
49 ammonium on the adsorption process. **Fig. 5a** presents the breakthrough curves for  
50 different imported ammonium concentrations (10 mg/L, 50 mg/L, and 100 mg/L) under  
51 a constant flow rate of 10 mL/min and a fixed bed height of 2 cm. As the ammonium  
52 concentration increases, both the saturation time and breakthrough time decrease. For  
53 an input concentration of 10 mg/L, the saturation time is 126 minutes, while for an input  
54 concentration of 100 mg/L, the saturation time reduces to 90 minutes. Increasing the  
55 concentration of the adsorbent reduces the running time of the tower. This is because,  
56 at a specific tower height and solution flow rate, higher concentrations of imported  
57 ammonium result in greater adsorption by the tower.

58 To assess the effect on ammonium salt adsorption, the optimal bed height was  
59 determined by adjusting the height of the MSZ layer. **Fig. 5b** demonstrates the influence  
60 of a constant inlet concentration (50 mg/L) and flow rate (10 mL/min) on ammonium  
61 salt adsorption using MSZ films of different thicknesses (1, 2, and 3 cm). Increasing  
62 the height of the MSZ layer promotes crack formation and saturation, thereby  
63 enhancing the rate of ammonium removal. As the MSZ layer height increases from 1  
64 cm to 2 cm and 3 cm, the corresponding saturation time also increases from 70 minutes  
65 to 120 minutes and 145 minutes, respectively. This trend aligns with the observed  
66 change in adsorption capacity ( $q_t$ ), indicating that the height of the adsorbent in the  
67 packing fixed bed directly affects the effectiveness of ammonium salt adsorption. This  
68 relationship arises because a greater height of the MSZ layer provides a larger number  
69 of active adsorption sites.

70 **Fig. 5c** illustrates the impact of different flow rates on ammonium adsorption in  
71 MSZ packed bed towers. The experimental flow rates ranged from 5 to 15 mL/min,  
72 while maintaining a constant inlet concentration of ammonium salt solution (50 mg/L)  
73 and a fixed MSZ layer height (2 cm). The fixed bed saturation time increased from 90  
74 minutes to 125 minutes and 200 minutes, respectively. The adsorption capacity of the  
75 fixed bed is directly proportional to the flow rate; however, the actual adsorption  
76 volume of ammonium decreases, resulting in a lower adsorption rate. These

77 observations can be attributed to an increase in the intensity of incoming air and a higher  
78 mass absorbed into the capillary through the fixed bed. The breakthrough duration is  
79 shortened due to the rapid saturation of the surfactant's active sites.

80

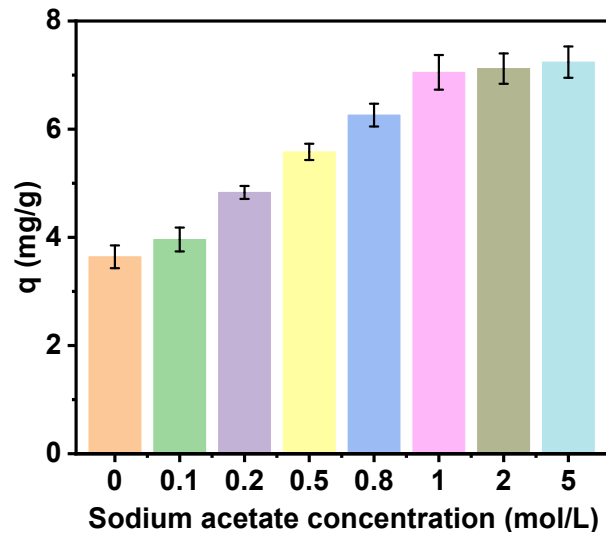

81

82 **Fig. S1** Adsorption capacity of zeolite for NH<sub>4</sub><sup>+</sup> at different concentrations of sodium acetate

83

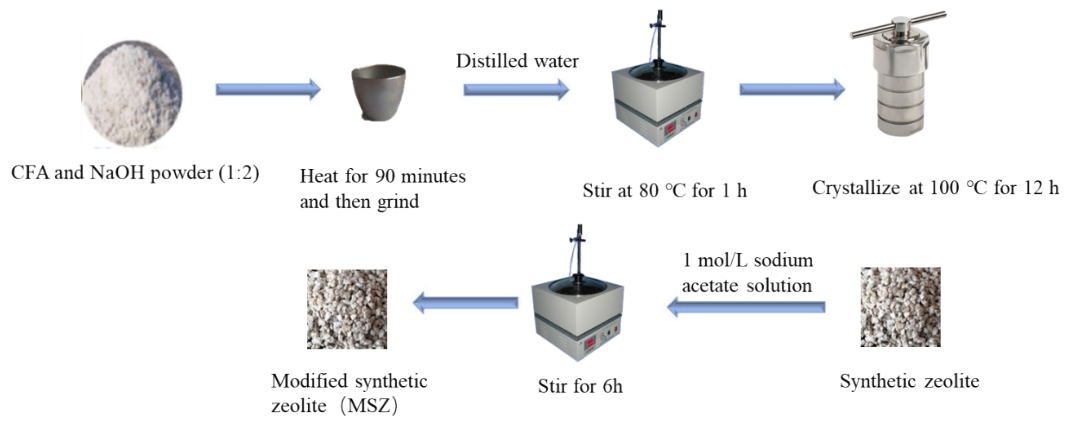

84

85

86

**Fig. S2** Schematic diagram of the material synthesis process.

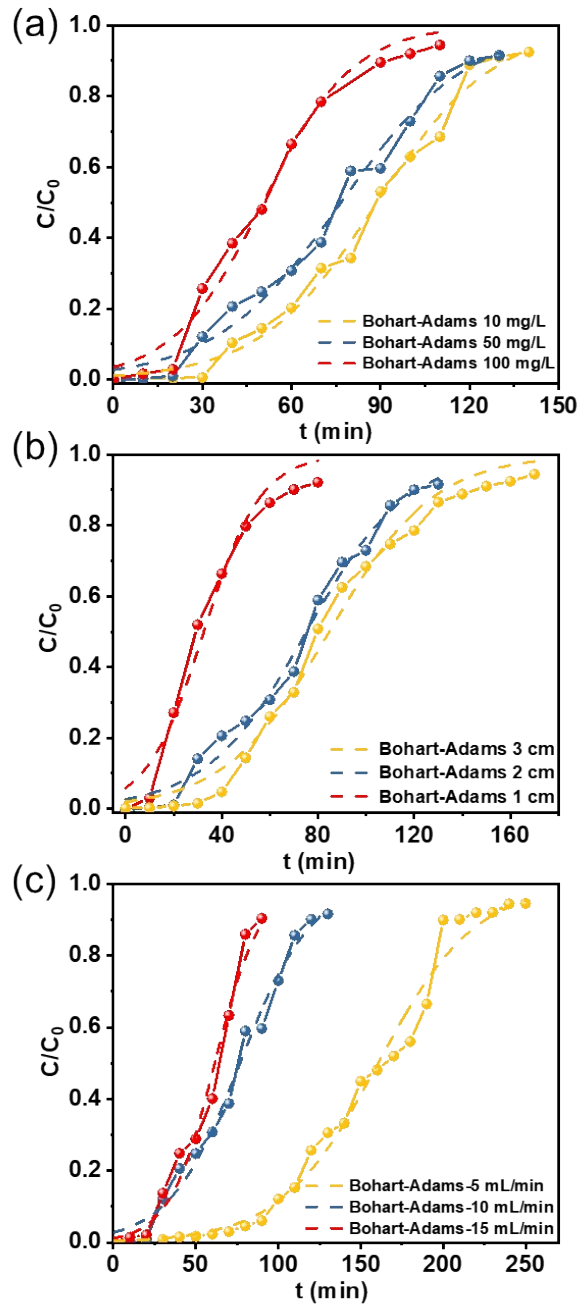

87

88 **Fig. S3** (a) The influence of inlet ammonium concentration on the breakthrough curve ( $H = 2$  cm,

89  $Q = 10$  mL/min), (b) the influence of fixed bed height on the ammonium adsorption breakthrough

90 curve of MSZ ( $C_0 = 50$  mg/L,  $Q = 10$  mL/min), (c) Effect of flow rate ( $C_0 = 50$  mg/L,  $H = 2$  cm)

91 on ammonium adsorption breakthrough curve.

92



**Table S1** Details of plant growth in pot experiment.

| Add NH <sub>4</sub> <sup>+</sup> -MSZ |                  |                  |                  |
|---------------------------------------|------------------|------------------|------------------|
| Germination rate (%)                  | Stem length (cm) | Root length (cm) | Fresh weight (g) |
| 83.33                                 | 7.429            | 4.921            | 0.2852           |
| Not add                               |                  |                  |                  |
| Germination rate (%)                  | Stem length (cm) | Root length (cm) | Fresh weight (g) |
| 73.33                                 | 5.888            | 3.516            | 0.2261           |
